# Supplementary material
Source: publisher figshare collection journal article supplement (https://frontiersin.figshare.com/ndownloader/files/14994470)
Supplement: Supplementary file [file 14994470]

***Supplementary Material***  
**Nano- and macroscale study of the lubrication of titania using  
pure and diluted ionic liquids**  
*Peter K. Cooper,<sup>a,#</sup> Joe Staddon,<sup>a,#</sup> Songwei Zhang,<sup>b</sup> Zachary M. Aman,<sup>c</sup> Rob Atkin<sup>a,\*</sup>  
and Hua Li,<sup>a,\*</sup>*

<sup>a</sup> School of Molecular Sciences, University of Western Australia, Crawley, Western  
Australia, Australia.

<sup>b</sup> State Key Laboratory of Solid Lubrication, Lanzhou Institute of Chemical Physics,  
Chinese Academy of Sciences, Lanzhou, P. R. China.

<sup>c</sup> Fluid Science and Resources, Department of Chemical Engineering, University of  
Western Australia, Crawley WA, Australia

#These authors contributed equally.

\*Corresponding authors emails: hua.li@uwa.edu.au, rob.atkin@uwa.edu.au

## Macrotribology

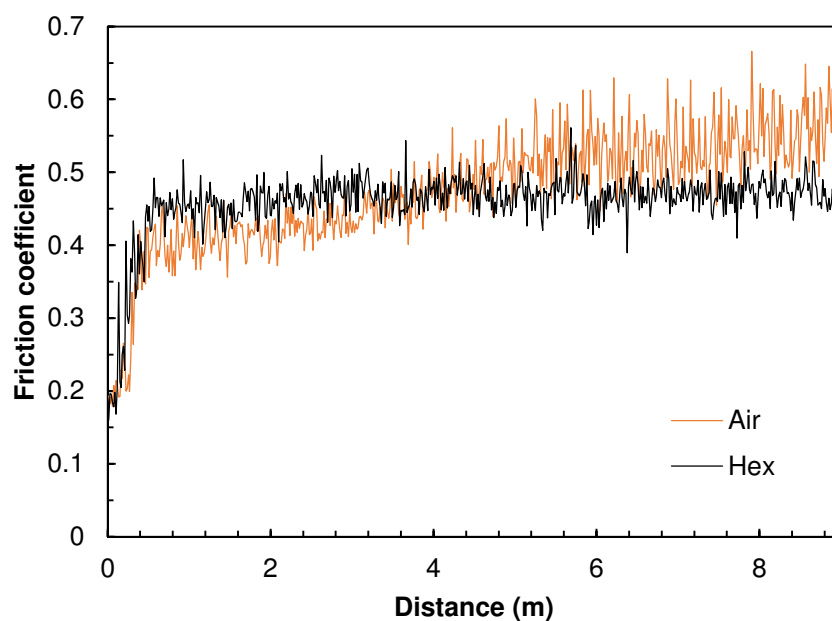

**FIGURE S1** | Friction coefficient vs sliding distance measured in air and hexadecane under a load of 5 N and at 25 °C.

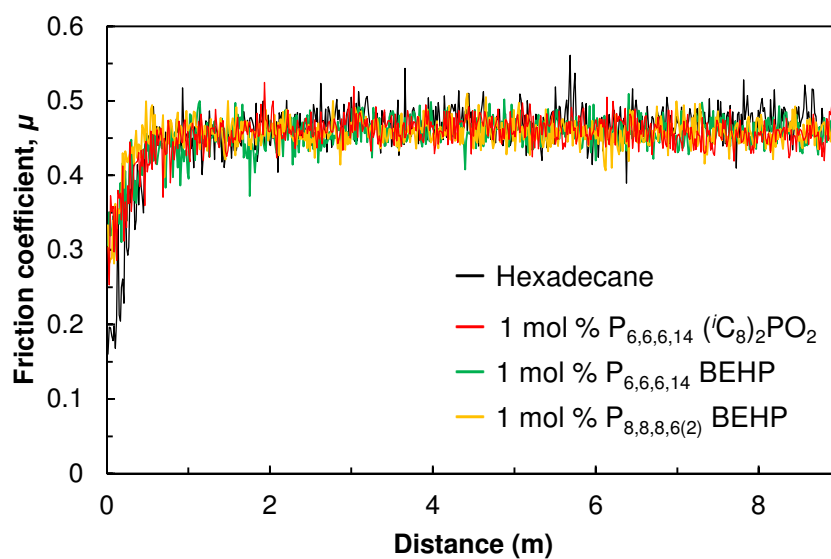

**FIGURE S2** | Friction coefficient as a function of sliding distance for three stainless steel balls sliding on a titanium surface in 1 mol % mixtures of IL in hexadecane. Sliding was carried out under 5 N of normal load and a temperature of 25 °C.

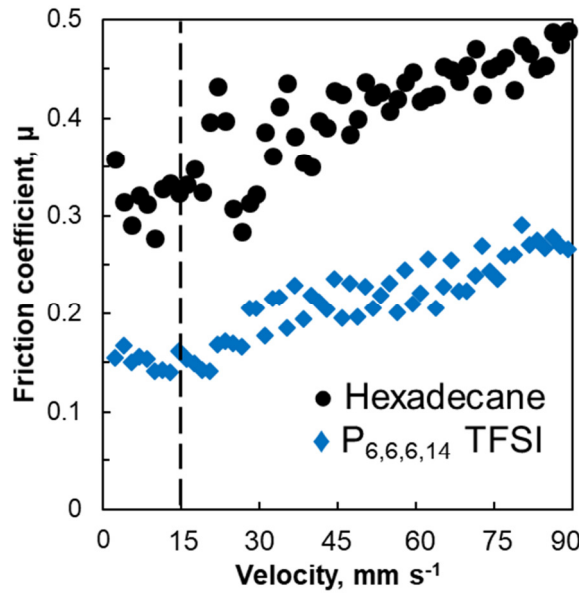

**FIGURE S3** | Friction coefficient as a function of velocity for three stainless steel balls sliding on a titanium surface in hexadecane (black circles) and P<sub>6,6,6,14</sub> TFSI (blue diamonds). The dashed line shows the velocity at which the other experiments were carried out. Sliding was carried out under 5 N of normal load and a temperature of 60 °C.

### Calculation of Hertzian Contact Stress

The effective Young's modulus  $E_w$  can be calculated by:

$$\frac{1}{E_w} = \frac{1}{2} \left( \frac{1 - \nu_1^2}{E_1} + \frac{1 - \nu_2^2}{E_2} \right)$$

Where  $E_1$ ,  $E_2$  are the elastic moduli and  $\nu_1$ ,  $\nu_2$  are the Poisson's ratios associated with each body.

Contact area radius is given by:

$$a \cong \left( \frac{3RF}{2E_w} \right)^{1/3}$$

Where  $R$  is the radius of the sphere.  $F$  is the applied load.

Contact stress:

$$p_{max} = \frac{3F}{2\pi a^2}$$

The parameters used:

Titania:  $E = 230$  GPa,  $\nu = 0.28$

Stainless Steel:  $E = 200$  GPa,  $\nu = 0.3$

Macrotribology test:

$$F = 5 \text{ N}, p_{max} = 0.5 \text{ GPa}$$

$$F = 10 \text{ nN}, p_{max} = 0.6 \text{ GPa}$$

In the nanotribology tests the exact dimensions and geometry of the tip are uncertain and subject to change. The contact pressures are significantly higher:

$$F = 50 \text{ nN}, p_{max} = 11.8 \text{ GPa}$$

$$F = 200 \text{ nN}, p_{max} = 18.7 \text{ GPa}$$

### Hamrock and Dowson model

Using the Hamrock and Dowson model the central film thickness,  $h_c$ , can be calculated by the following equation (Stachowiak and Batchelor, 2005):

$$\frac{h_c}{R'} = 2.69 \left( \frac{U\eta_0}{E'R'} \right)^{0.67} (\alpha E')^{0.53} \left( \frac{W}{E'R'^2} \right)^{-0.067} (1 - 0.61e^{-0.73k})$$

where  $a$  is the contact area radius from eq(2),  $U$  is the sliding velocity,  $\eta_0$  is the viscosity of the lubricant at ambient pressure,  $E_w$  is the effective Young's modulus from eq(1),  $\alpha$  is the pressure-viscosity coefficient,  $F$  is the applied load, and  $k$  is the ellipticity parameter.  $k = 1$  for point contact. The pressure – viscosity coefficient of hexadecane varies from 11.6 to 13.2, and average of 12.5 is used here (Pensado et al., 2008; Paredes et al., 2012). For the pure ILs used in this study, the pressure-viscosity coefficient was not found in the literature. According to previous studies, the pressure-viscosity coefficient of ILs are generally between 12~21  $\text{GPa}^{-1}$  (Pensado et al., 2008; Paredes et al., 2012; Mordukhovich et al., 2013; Gaciño et al., 2015), thus here the film thicknesses of the systems are calculated by assuming the limit values of 12  $\text{GPa}^{-1}$  and 21  $\text{GPa}^{-1}$  for the pure ILs.

Table S1 shows the calculated film thicknesses do not vary significantly for different chosen values of the pressure-viscosity coefficient.

**TABLE S1** | The pressure-viscosity coefficients and calculated film thicknesses  $h_c$  for the lubricants used in this study.

| Lubricant                                                                      | $h_c$ (nm)                       |      | $h_c$ (nm)                       |      |
|--------------------------------------------------------------------------------|----------------------------------|------|----------------------------------|------|
|                                                                                | $(\alpha = 12 \text{ GPa}^{-1})$ |      | $(\alpha = 21 \text{ GPa}^{-1})$ |      |
|                                                                                | 5 N                              | 10 N | 5 N                              | 10 N |
| P <sub>6,6,6,14</sub> TFSI                                                     | 18                               | 18   | 25                               | 24   |
| P <sub>8,8,8,6(2)</sub> BEHP                                                   | 55                               | 52   | 74                               | 70   |
| P <sub>6,6,6,14</sub> BEHP                                                     | 40                               | 39   | 54                               | 52   |
| P <sub>6,6,6,14</sub> ( <i>i</i> C <sub>8</sub> ) <sub>2</sub> PO <sub>2</sub> | 42                               | 40   | 56                               | 54   |
| Hexadecane                                                                     | 1                                | 1    | 1                                | 1    |

## References

- Gaciño, F.M., Comuñas, M.J.P., Regueira, T., Segovia, J.J., and Fernández, J. (2015). On the viscosity of two 1-butyl-1-methylpyrrolidinium ionic liquids: Effect of the temperature and pressure. *The Journal of Chemical Thermodynamics* 87, 43-51.
- Mordukhovich, G., Qu, J., Howe, J.Y., Bair, S., Yu, B., Luo, H., Smolenski, D.J., Blau, P.J., Bunting, B.G., and Dai, S. (2013). A low-viscosity ionic liquid demonstrating superior lubricating performance from mixed to boundary lubrication. *Wear* 301, 740-746.
- Paredes, X., Fandiño, O., Pensado, A.S., Comuñas, M.J.P., and Fernández, J. (2012). Pressure–Viscosity Coefficients for Polyalkylene Glycol Oils and Other Ester or Ionic Lubricants. *Tribology Letters* 45, 89-100.
- Pensado, A.S., Comuñas, M.J.P., and Fernández, J. (2008). The Pressure–Viscosity Coefficient of Several Ionic Liquids. *Tribology Letters* 31, 107-118.
- Stachowiak, G.W., and Batchelor, A.W. (2005). *Engineering Tribology*. Elsevier Butterworth-Heinemann.
